# Supplementary material for: Identification of Fungal Pathogens by Visible Microarray System in Combination with Isothermal Gene Amplification
Source: PubMed Central journal article supplement (PMC4098066; doi:10.1007/s11046-014-9756-2), 2014-06-22
Supplement: 11046_2014_9756_MOESM2_ESM.pdf [file 11046_2014_9756_MOESM2_ESM.pdf]

**TableS2** Reference sequences used to make alignment

| Genus                   | Referred sequence number   | Referred sequence number of objective | Objectibe fungi                                      | Example accession No. |
|-------------------------|----------------------------|---------------------------------------|------------------------------------------------------|-----------------------|
| <i>Absidia</i>          | 57                         | 12                                    | <i>Absidia corymbifera</i>                           | FJ345350              |
| <i>Alternaria</i>       | 42                         | -                                     | <i>Alternaria alternata</i>                          | FJ717729              |
| <i>Aspergillus</i>      | 110                        | 15                                    | <i>Aspergillus flavus</i>                            | HQ340110              |
|                         |                            | 30                                    | <i>Aspergillus fumigatus</i>                         | EF669999              |
|                         |                            | 22                                    | <i>Aspergillus nidulans</i>                          | AB248971              |
|                         |                            | 18                                    | <i>Aspergillus niger</i>                             | HQ607993              |
|                         |                            | 15                                    | <i>Aspergillus terreus</i>                           | AB369899              |
| <i>Blastomyces</i>      | 9                          | 6                                     | <i>Blastomyces dermatitidis</i>                      | U18364                |
| <i>Candida</i>          | 140                        | 33                                    | <i>Candida albicans</i>                              | HM016890              |
|                         |                            | 20                                    | <i>Candida dubliniensis</i>                          | AB369916              |
|                         |                            | 12                                    | <i>Candida famata</i>                                | HE681104              |
|                         |                            | 18                                    | <i>Candida glabrata</i>                              | AB467297              |
|                         |                            | 8                                     | <i>Candida guilliermondii</i>                        | AB369917              |
|                         |                            | 6                                     | <i>Candida kefyr</i>                                 | GU256755              |
|                         |                            | 5                                     | <i>Candida krusei</i>                                | AY939808              |
|                         |                            | 7                                     | <i>Candida lusitaniae</i>                            | AY174102              |
|                         |                            | 13                                    | <i>Candida parapsilosis</i>                          | AB109231              |
|                         |                            | 4                                     | <i>Candida rugosa</i>                                | GU144663              |
|                         |                            | 9                                     | <i>Candida tropicalis</i>                            | AB467289              |
| 5                       | <i>Candida zeylanoides</i> | AB278160                              |                                                      |                       |
| <i>Coccidioides</i>     | 8                          | 5                                     | <i>Coccidioides posadasii</i>                        | AB232896              |
| <i>Cryptococcus</i>     | 56                         | 20                                    | <i>Cryptococcus gattii</i>                           | FJ534877              |
|                         |                            | 13                                    | <i>Cryptococcus neoformans</i>                       | CP003821              |
| <i>Cunninghamella</i>   | 11                         | 6                                     | <i>Cunninghamella bertholletiae</i>                  | AF254931              |
| <i>Epidermophyton</i>   | 7                          | 4                                     | <i>Epidermophyton floccosum</i>                      | AY213646              |
| <i>Exophiala</i>        | 21                         | 21                                    | <i>Exophiala dermatitidis</i>                        | AF147495              |
| <i>Fusarium</i>         | 111                        | -                                     | <i>Fusarium oxysporum</i>                            | HQ148098              |
|                         |                            | 64                                    | <i>Fusarium solani (Fusarium solani complex: FSS</i> | AB551665              |
| <i>Histoplasma</i>      | 10                         | 8                                     | <i>Histoplasma capsulatum</i>                        | AB071821              |
| <i>Malassezia</i>       | 24                         | 8                                     | <i>Malassezia furfur</i>                             | AB105151              |
| <i>Microsporum</i>      | 28                         | 6                                     | <i>Microsporum canis</i>                             | AB193669              |
|                         |                            | 5                                     | <i>Microsporus gypseum</i>                           | AB193671              |
| <i>Mucor</i>            | 32                         | -                                     | <i>Mucor hiemalis</i>                                | AY243951              |
| <i>Paracoccidioides</i> | 4                          | 4                                     | <i>Paracoccidioides brasiliensis</i>                 | AB304448              |
| <i>Penicillium</i>      | 30                         | 8                                     | <i>Penicillium marneffeii</i>                        | AB353919              |
| <i>Pichia</i>           | 35                         | 2                                     | <i>Pichia anomala</i>                                | KC568565              |
|                         |                            | 3                                     | <i>Pichia norvegensis</i>                            | AB278169              |
| <i>Rhizomucor</i>       | 12                         | -                                     | <i>Rhizomucor miehei</i>                             | HM999960              |
|                         |                            | -                                     | <i>Rhizomucor pusillus</i>                           | AB369914              |

|                     |    |    |                                    |          |
|---------------------|----|----|------------------------------------|----------|
| <i>Rhizopus</i>     | 40 | 13 | <i>Rhizopus microsporus</i>        | DQ641315 |
|                     |    | 5  | <i>Rhizopus oryzae</i>             | DQ641354 |
| <i>Rhodotorula</i>  | 39 | 7  | <i>Rhodotorula mucilaginosa</i>    | AF444738 |
| <i>Scedosporium</i> | 35 | 10 | <i>Scedosporium prolificans</i>    | EF568078 |
| <i>Sporothrix</i>   | 30 | 7  | <i>Sporothrix schenckii</i>        | AB089139 |
| <i>Trichophyton</i> | 42 | 11 | <i>Trichophyton rubrum</i>         | AB194245 |
|                     |    | 10 | <i>Trichophyton mentagrophytes</i> | JQ928411 |
|                     |    | 8  | <i>Trichophyton tonsurans</i>      | AB220044 |
| <i>Trichosporon</i> | 35 | 11 | <i>Trichosporon asahii</i>         | AB369919 |
|                     |    | -  | <i>Trichosporon asteroides</i>     | FJ943421 |
|                     |    | 9  | <i>Trichosporon cutaneum</i>       | AB018020 |
